# Supplementary material
Source: publisher figshare collection journal article supplement (https://karger.figshare.com/articles/dataset/_/5607232)

**Suppl. Fig. 3**

**72h Got1 Caspase 3/7**

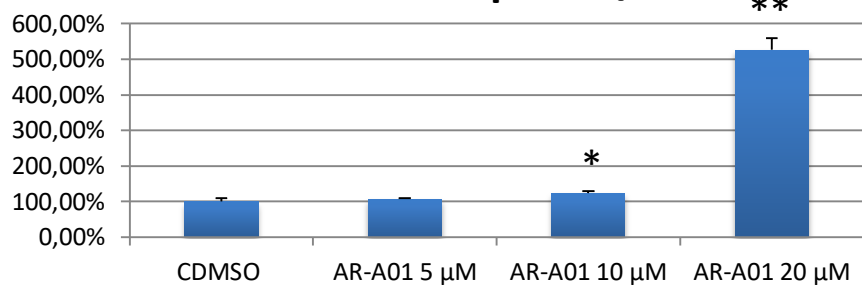

**144h Got1 Caspase 3/7**

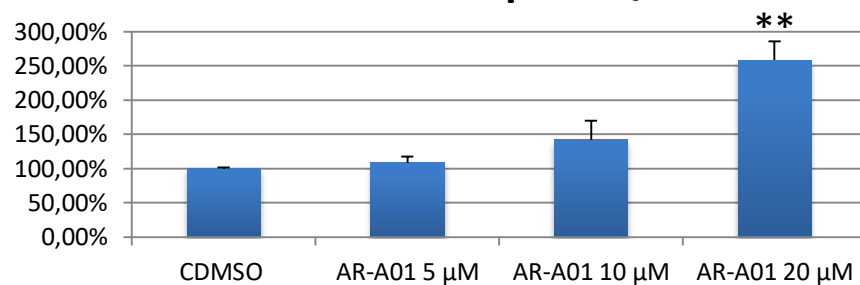

**72h Bon1 Caspase 3/7**

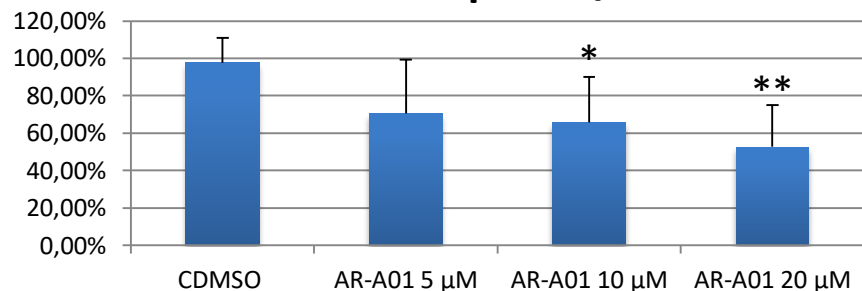

**144h Bon1 Caspase 3/7**

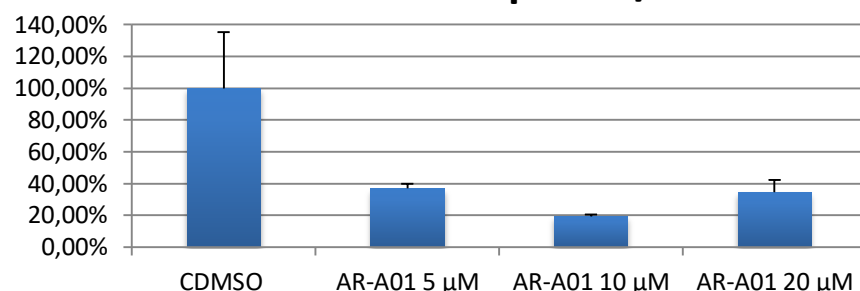

**72h QGP1 Caspase 3/7**

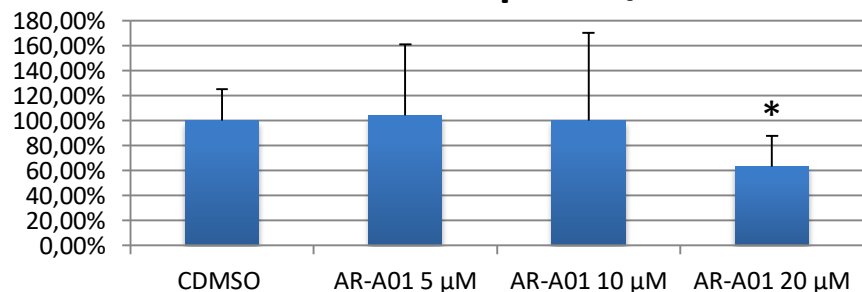

**144h QGP1 Caspase 3/7**

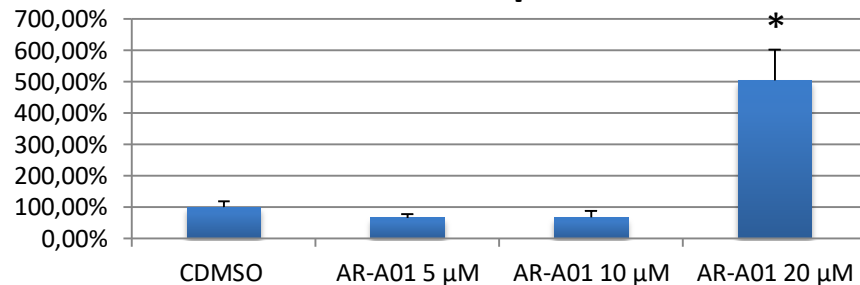

**72h H727 Caspase 3/7**

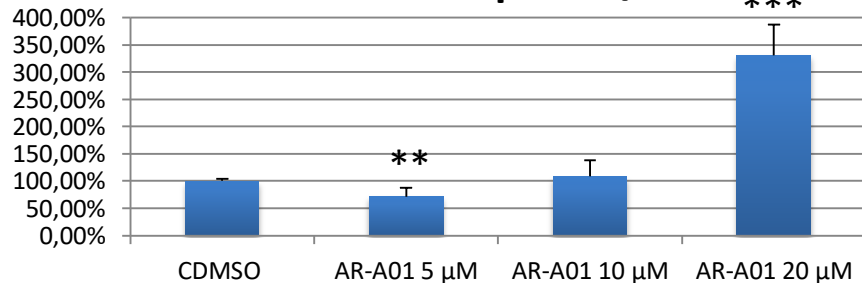

**144h H727 Caspase 3/7**

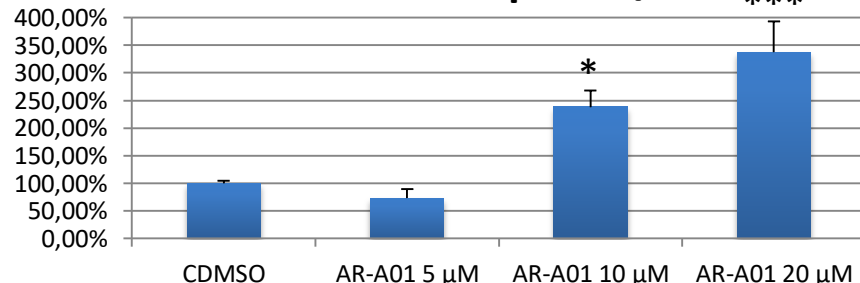

Supplement: Supplementary file 1 [file 1]
