# Supplementary material
Source: publisher figshare collection journal article supplement (https://karger.figshare.com/articles/dataset/_/5607232)

Suppl. Fig. 4

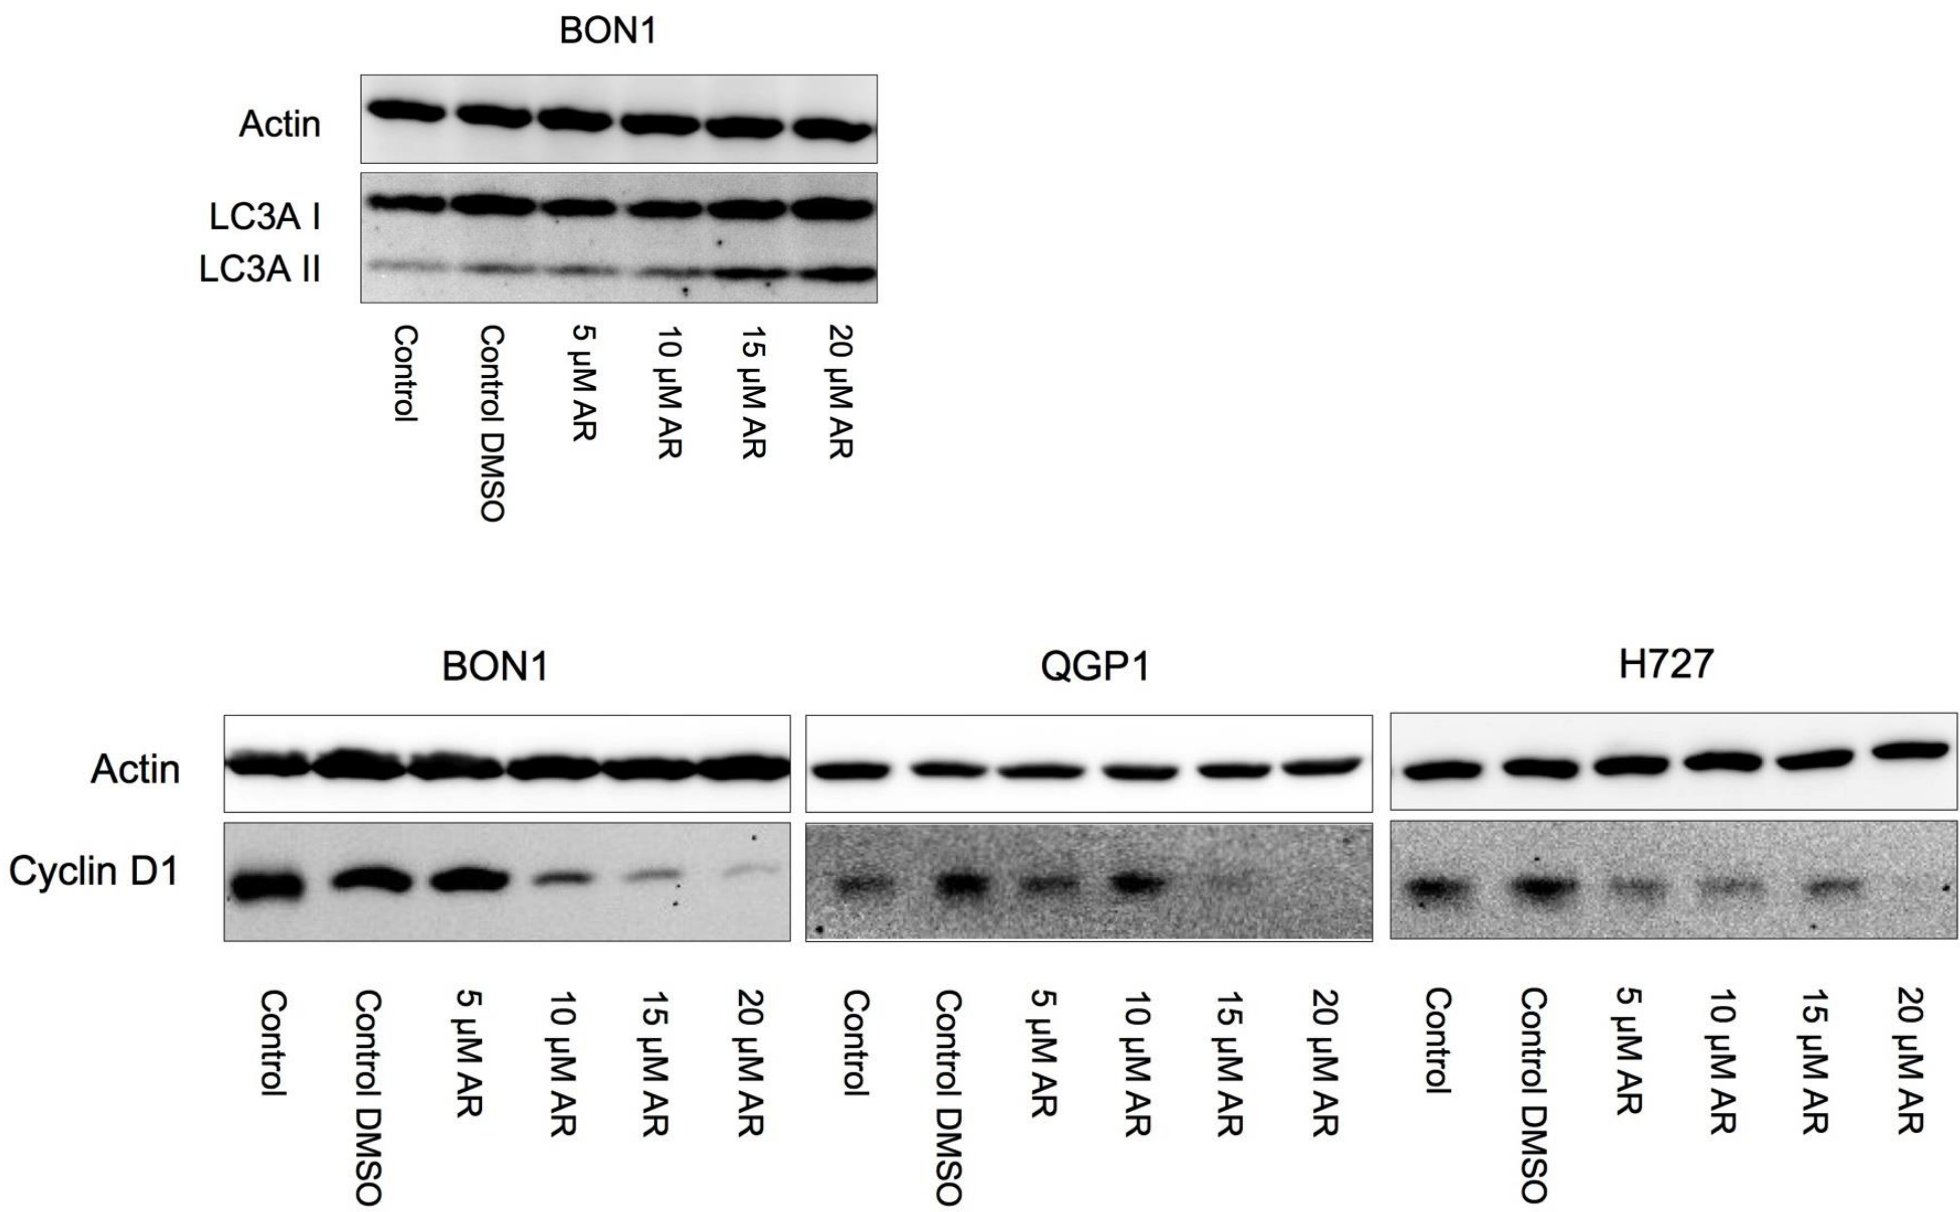

Supplement: Supplementary file 2 [file 1]

Suppl. Fig.5

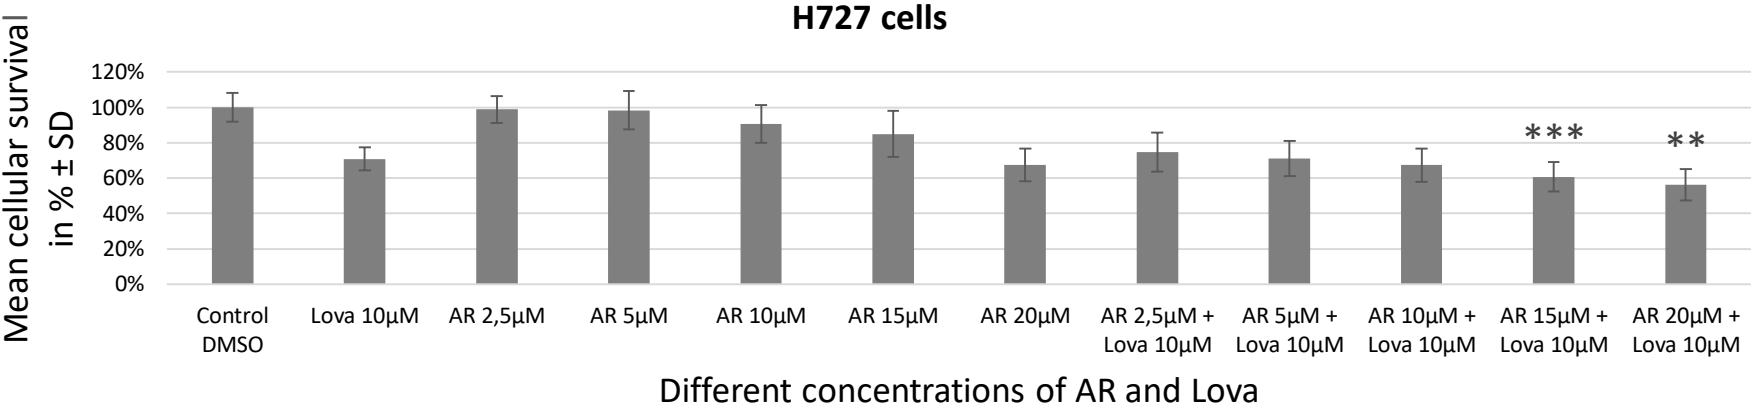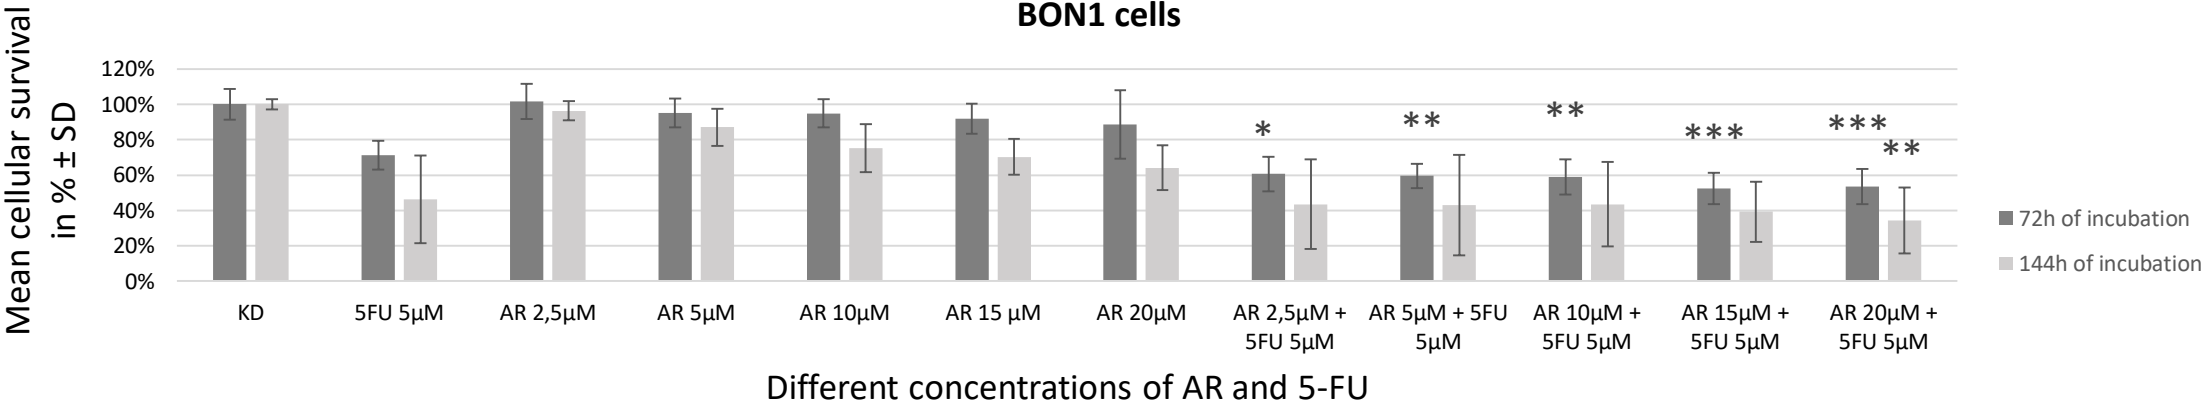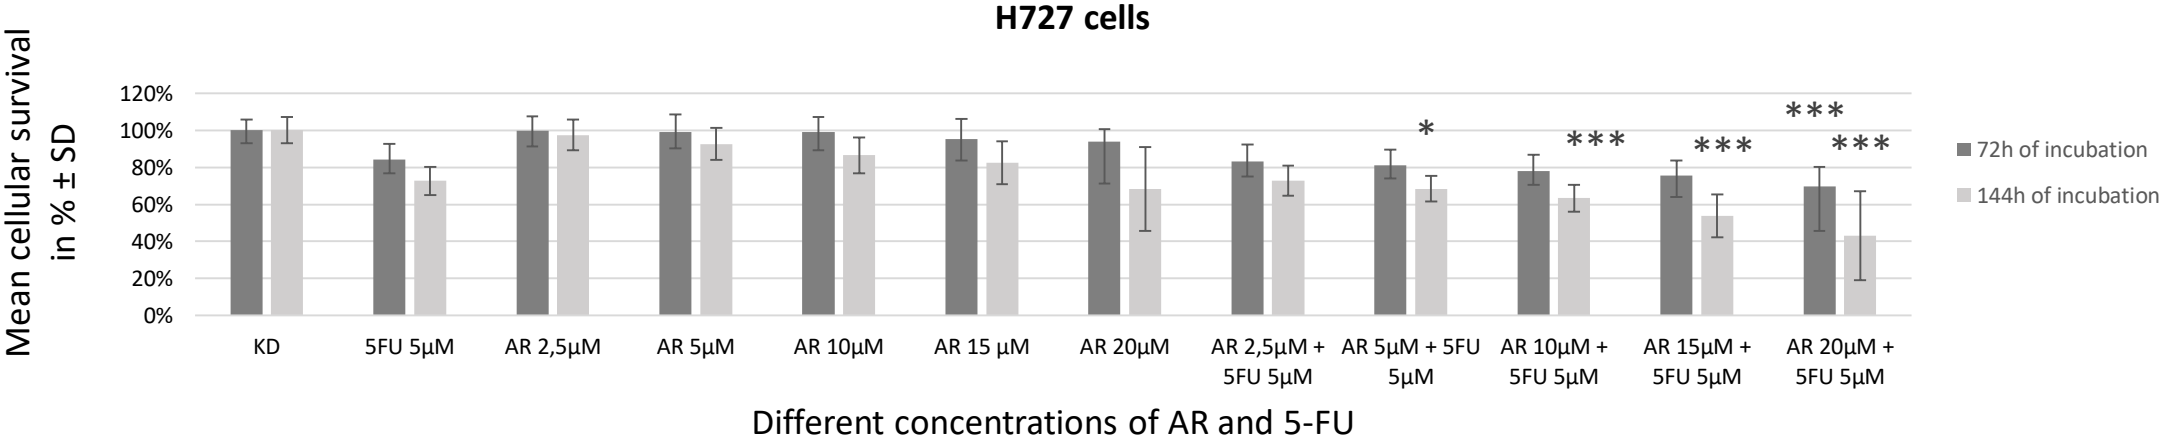

Supplement: Supplementary file 3 [file 1]

Suppl. Fig. 6

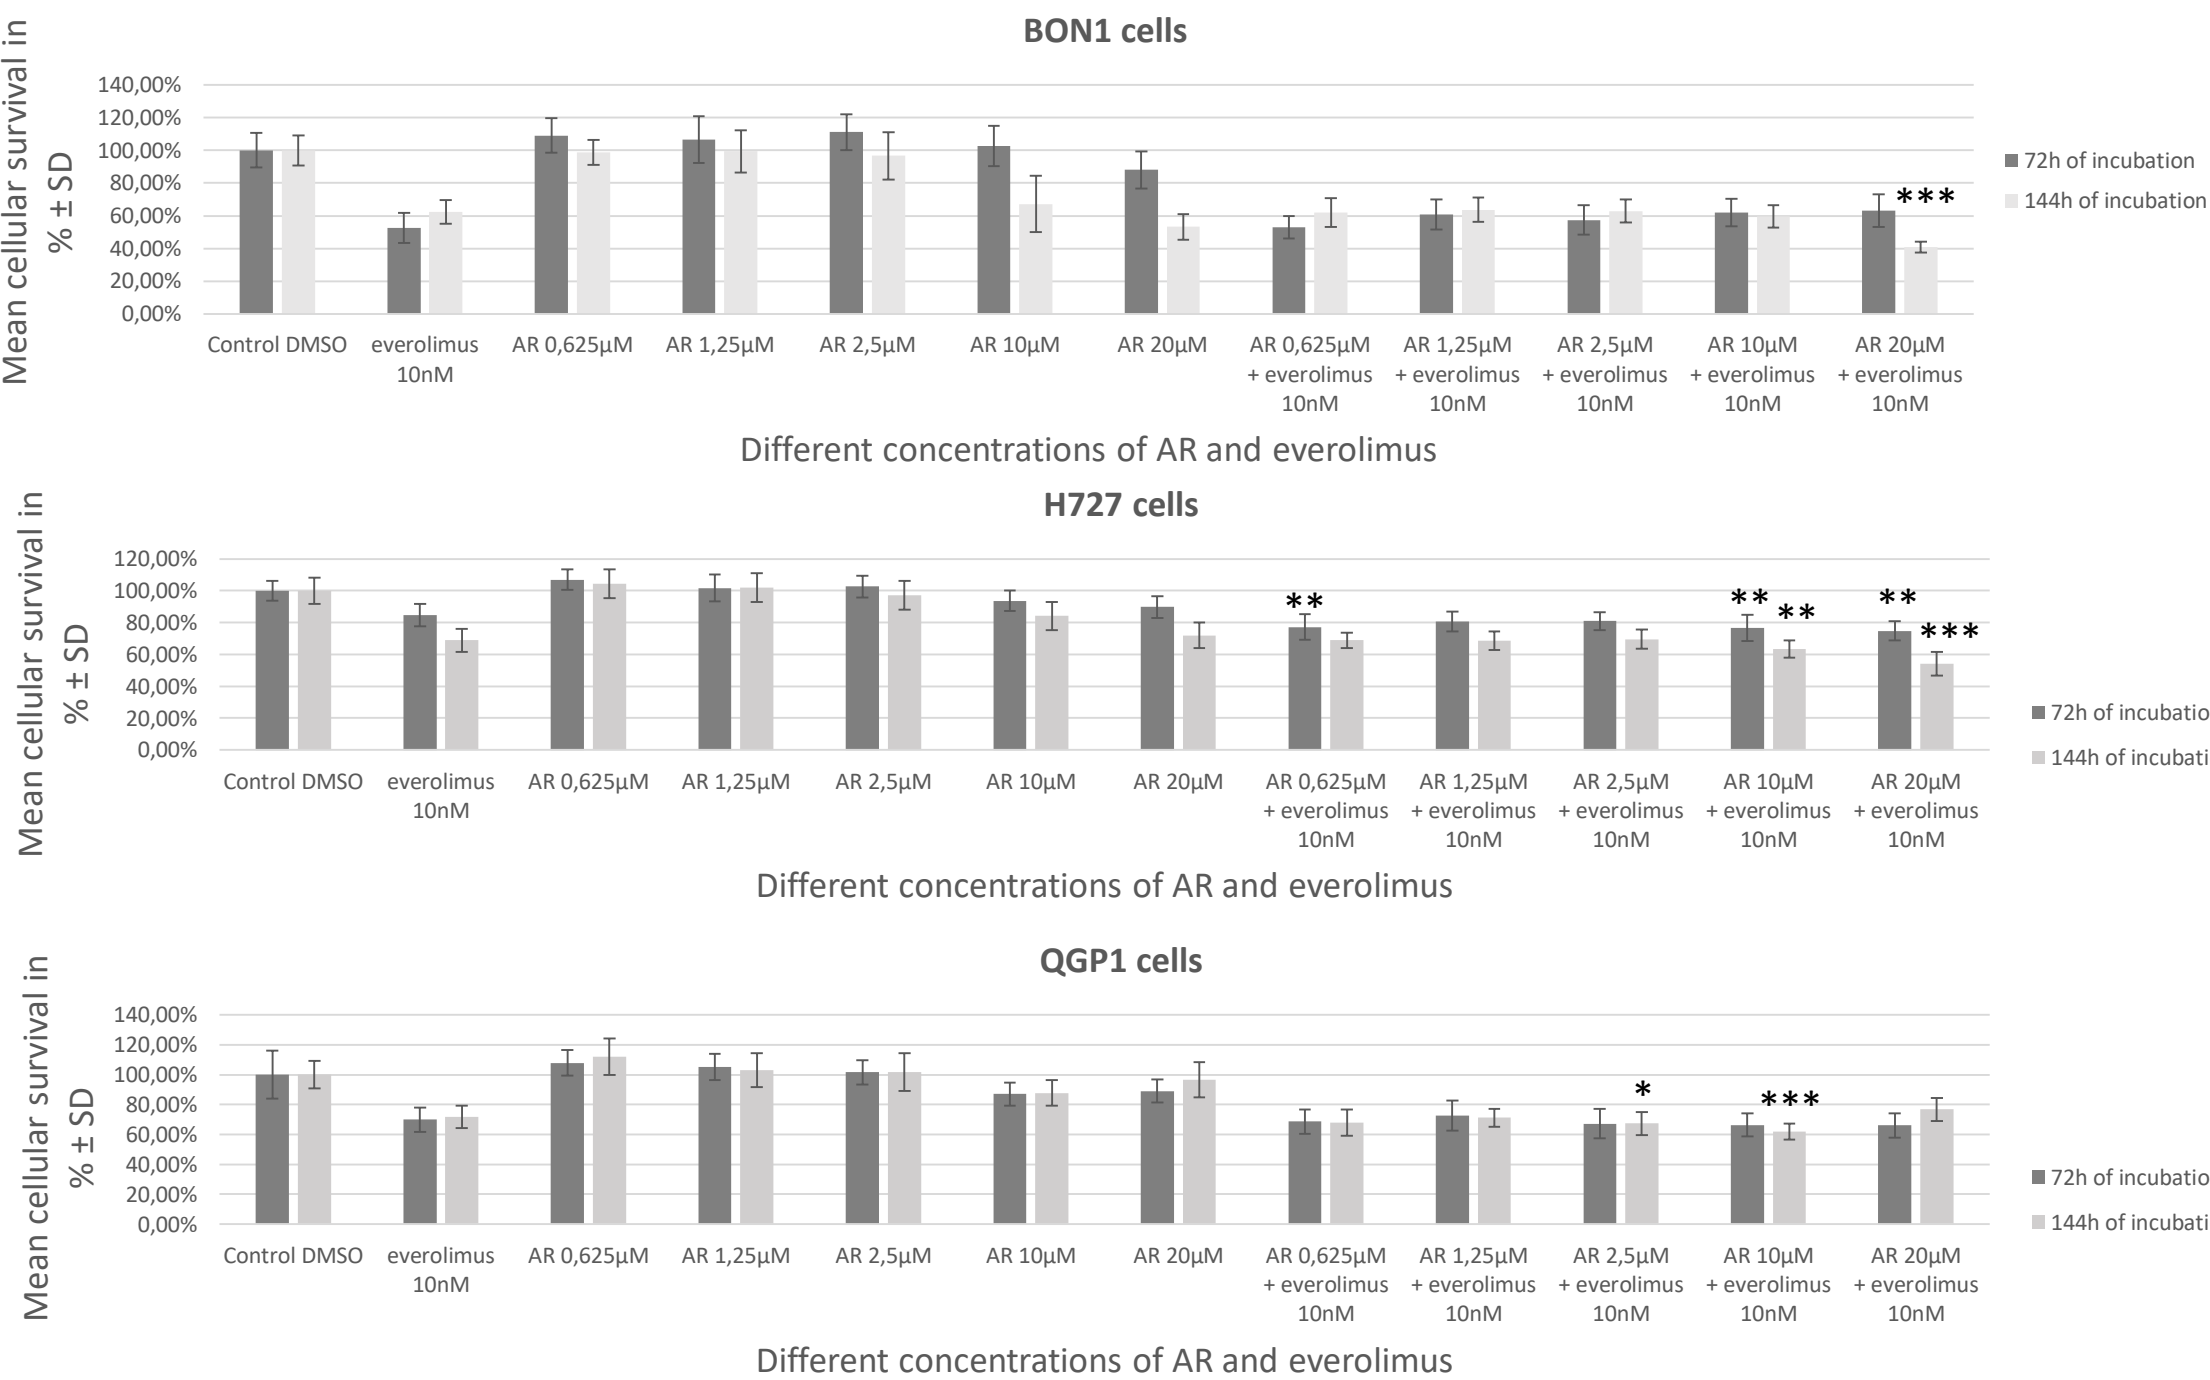

Supplement: Supplementary file 4 [file 1]

Suppl. Fig. 7

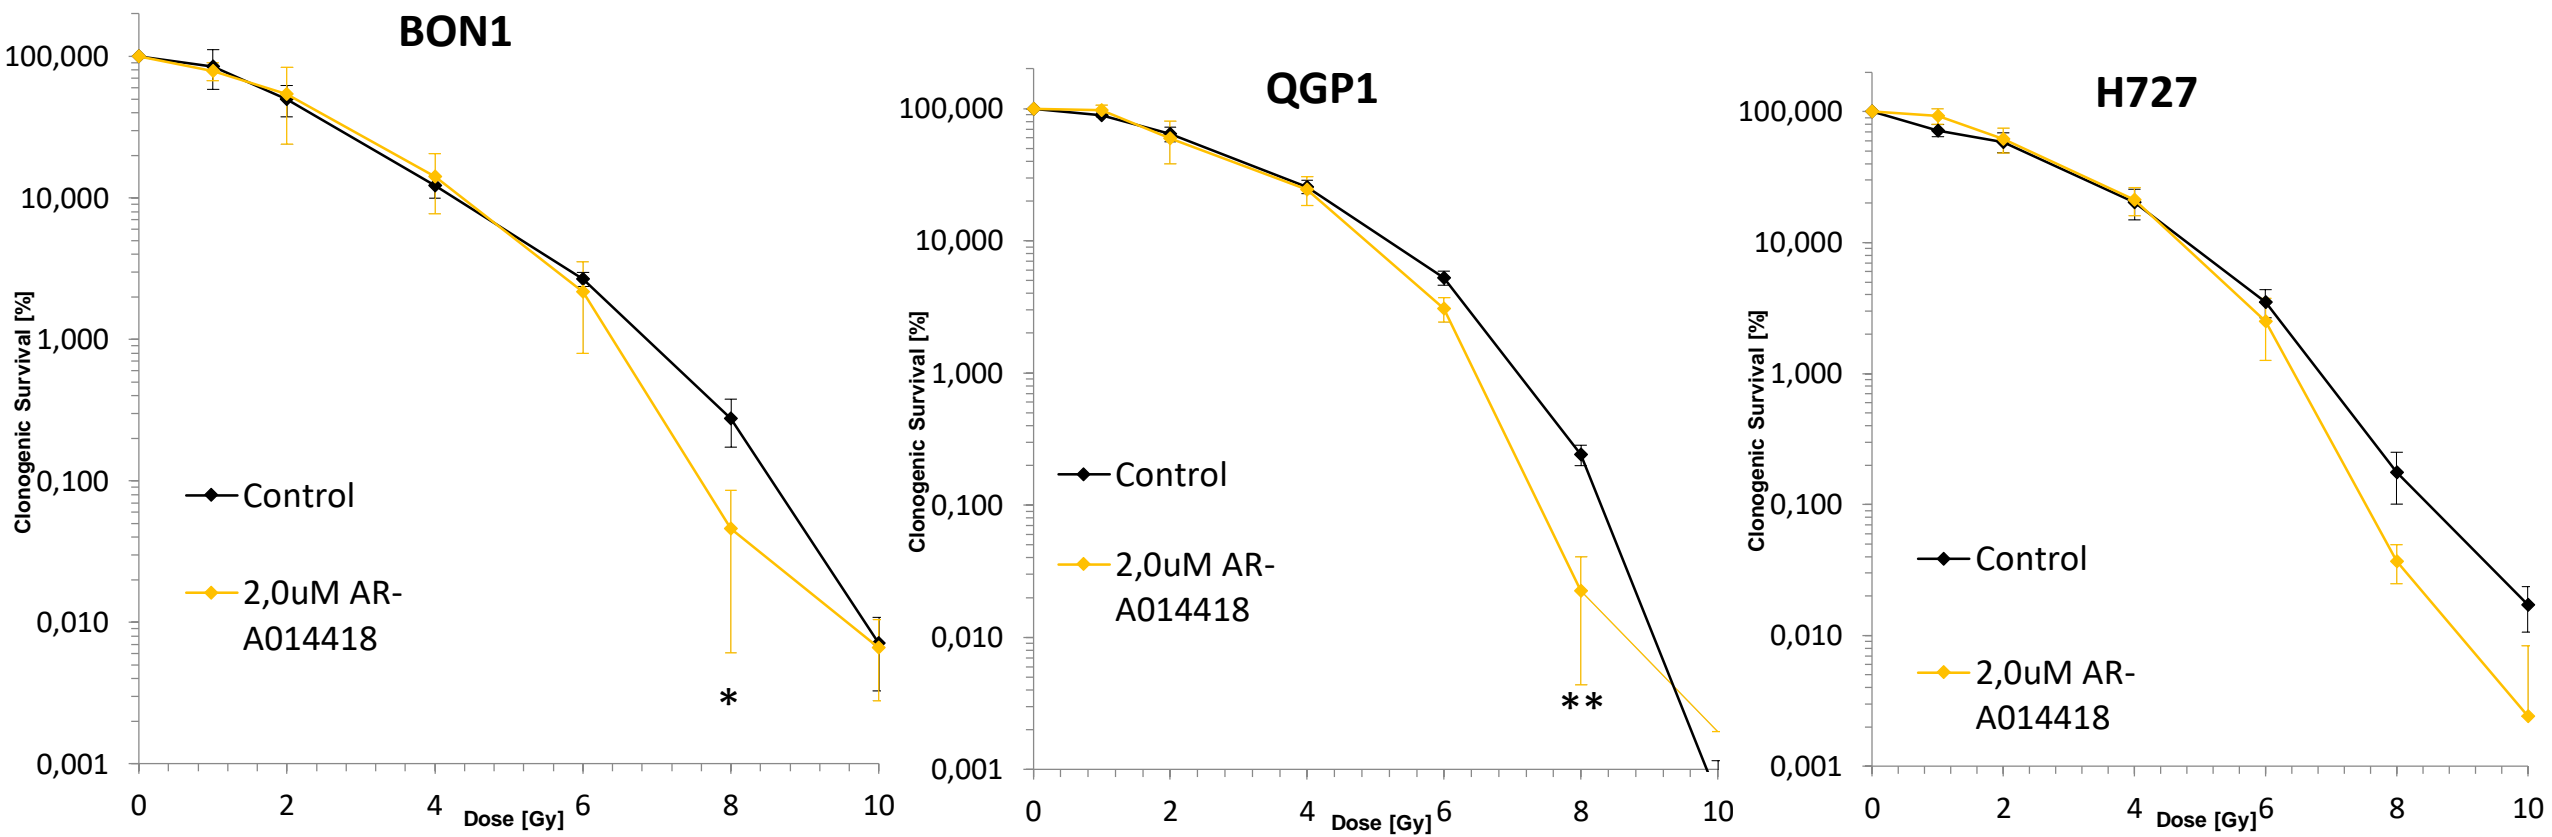

Supplement: Supplementary file 5 [file 1]

Suppl. Fig. 2

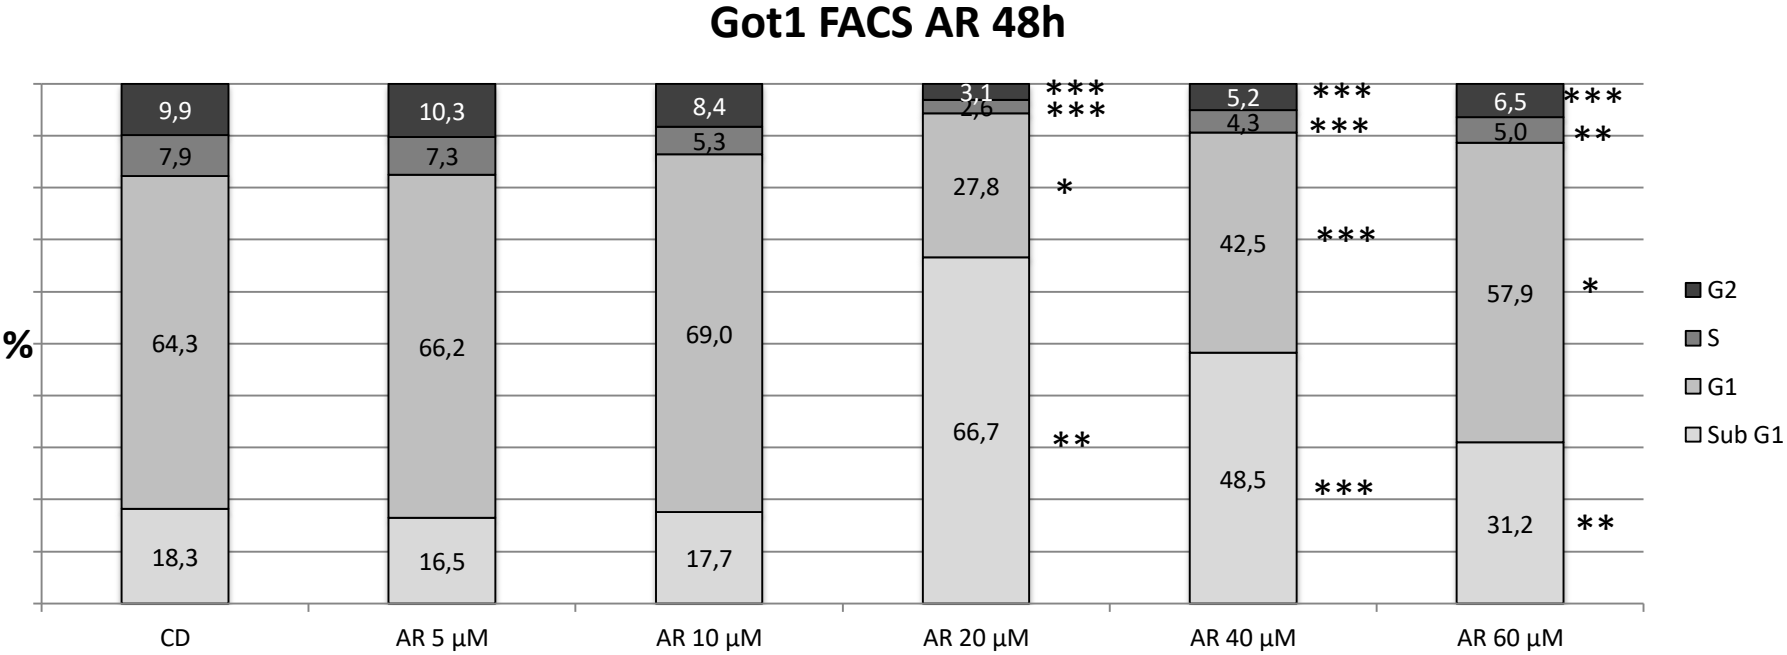

Supplement: Supplementary file 6 [file 1]
